# Supplementary material for: Evidence for quantum effects in the predissociation of methylamine isotopologues
Source: Royal Society of Chemistry journal article supplement (doi:10.1039/c5cp01193k), 2015-01-01
Supplement: c5cp01193k1.pdf [file c5cp01193k1.pdf]

## Electronic Supplementary Information

### **Evidence for quantum effects in predissociation of methylamine isotopologues**

Michael Epshtein, Alexander Portnov and Ilana Bar\*

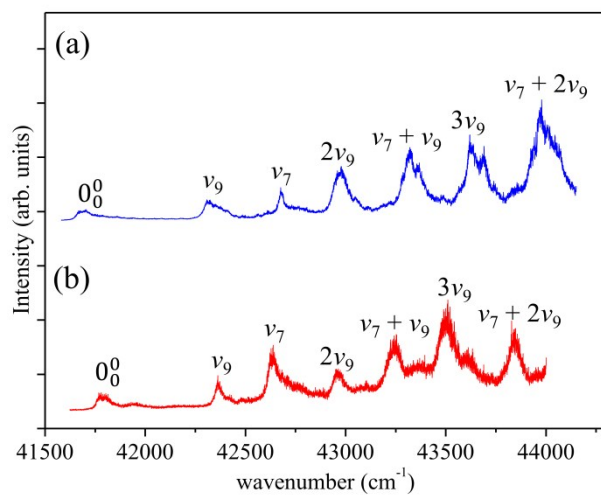

Fig. S1. Jet-cooled H photofragment action spectra obtained in predissociation of (a) methylamine and (b) methylamine- $d_3$ , taken from Refs. 24 and 25, respectively. The assignment of the observed bands is based on Ref. 14.

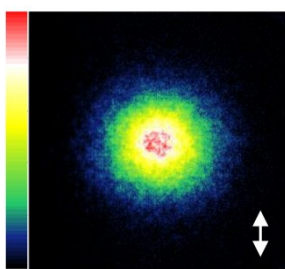

Fig. S2. Measured TCRD velocity map of the D photofragments, obtained from C–D bond breaking in methylamine- $d_3$ , following excitation to the  $0_0^0$  state.
